# Supplementary material for: The Effect of Vinyasa Yoga Practice on the Well-Being of Breast-Cancer Patients during COVID-19 Pandemic
Source: MDPI journal article supplement (doi:10.3390/ijerph20043770), 2023-02-20
Supplement: s1 [file s1]

## Survey

### **Before practice**

#### **Do you practice yoga?**

Yes, regularly

Yes, sometimes

I practiced in the past

I never practiced yoga

#### **What are your motivations to practice yoga?**

better stress management

improved quality of sleep

specific health needs

the desire to stretch the body

build strength

meditation/spiritual needs

the need to integrate psyche and body

the need to increase vitality

#### **How do you assess your overall health during the past week?**

Very bad 1 2 3 4 5 6 7 excellent

#### **Does a long walk make you tired?**

Never 1 2 3 4 Very often

#### **Does a short walk outside the house make it difficult for you?**

Never 1 2 3 4 Very often

#### **Do you need help eating, dressing, washing yourself or using the toilet?**

Never 1 2 3 4 Very often

#### **Have you been restricted from doing your job or other daily activities in the past week?**

Never 1 2 3 4 Very often

#### **Have you been limited in pursuing your hobbies or other pleasures in the past week?**

Never 1 2 3 4 Very often

#### **Have you had any pains in the past week?**

Never 1 2 3 4 Very often

#### **Have you needed any rest in the past week?**

Never 1 2 3 4 Very often

#### **Have you experienced difficulty sleeping in the past week?**

Never 1 2 3 4 Very often

#### **Have you felt any weakness in the past week?**

Never 1 2 3 4 Very often

#### **Have you been tired in the past week?**

Never 1 2 3 4 Very often

**Has pain interfered with your daily activities in the past week?**

Never 1 2 3 4 Very often

**Have you felt tense in the past week?**

Never 1 2 3 4 Very often

**Have you been worried in the past week?**

Never 1 2 3 4 Very often

**Have you felt irritable in the past week?**

Never 1 2 3 4 Very often

**Have you felt depressed in the past week?**

Never 1 2 3 4 Very often

**Have you had difficulty remembering in the past week?**

Never 1 2 3 4 Very often

**In the past week, has your health condition or treatment caused you financial hardship?**

Never 1 2 3 4 Very often

**Have recent worries kept you up at night?**

Never 1 2 3 4 Very often

**Have you been able to enjoy your usual daily activities lately?**

Never 1 2 3 4 Very often

I would very much like to ask you to choose the answer that best describes your well-being during the last month.

A

I'm not sad or depressed

I often feel sad and depressed

I am experiencing constant sadness, depression and I cannot free myself from these experiences

I am constantly so sad and unhappy that it is unbearable

B

I'm not too worried about the future

I often worry about the future

I'm afraid that nothing good awaits me in the future

I feel that the future is hopeless and nothing will change that

C

I'm satisfied with myself

I'm not satisfied with myself

I feel self-loathing

I hate myself

D

I don't cry more than usual

I cry more often than I used to

I still want to cry

I'd like to cry, but I'm not able to

E

I'm no more nervous than I used to be  
I am constantly nervous and irritable  
I am constantly nervous and irritable  
Everything that used to irritate me has become indifferent

F  
I sleep well, as usual  
I sleep worse than I used to  
In the morning, I wake up 1-2 hours too early and find it difficult to get back to sleep again  
I wake up a few hours too early and can't get to sleep

Age  
Date of birth

Sex  
.....

### **After practice**

**Did you notice the effects of yoga practice?**

Improve health  
Improve body flexibility  
Muscle gain  
Improving mental health  
Stress relief  
Reduction of sleep problems  
Alleviation of digestive/stomach discomforts  
Improved respiratory capacity  
Fatigue reduction

**How do you assess your overall health during the past week?**

Very bad 1 2 3 4 5 6 7 excellent

**Does a long walk make you tired?**

Never 1 2 3 4 Very often

**Does a short walk outside the house make it difficult for you?**

Never 1 2 3 4 Very often

**Do you need help eating, dressing, washing yourself or using the toilet?**

Never 1 2 3 4 Very often

**Have you been restricted from doing your job or other daily activities in the past week?**

Never 1 2 3 4 Very often

**Have you been limited in pursuing your hobbies or other pleasures in the past week?**

Never 1 2 3 4 Very often

**Have you had any pains in the past week?**

Never 1 2 3 4 Very often

**Have you needed any rest in the past week?**

Never 1 2 3 4 Very often

**Have you experienced difficulty sleeping in the past week?**

Never 1 2 3 4 Very often

**Have you felt any weakness in the past week?**

Never 1 2 3 4 Very often

**Have you been tired in the past week?**

Never 1 2 3 4 Very often

**Has pain interfered with your daily activities in the past week?**

Never 1 2 3 4 Very often

**Have you felt tense in the past week?**

Never 1 2 3 4 Very often

**Have you been worried in the past week?**

Never 1 2 3 4 Very often

**Have you felt irritable in the past week?**

Never 1 2 3 4 Very often

**Have you felt depressed in the past week?**

Never 1 2 3 4 Very often

**Have you had difficulty remembering in the past week?**

Never 1 2 3 4 Very often

**In the past week, has your health condition or treatment caused you financial hardship?**

Never 1 2 3 4 Very often

**Have recent worries kept you up at night?**

Never 1 2 3 4 Very often

**Have you been able to enjoy your usual daily activities lately?**

Never 1 2 3 4 Very often

I would very much like to ask you to choose the answer that best describes your well-being during the last month.

**A**

I'm not sad or depressed

I often feel sad and depressed

I am experiencing constant sadness, depression and I cannot free myself from these experiences

I am constantly so sad and unhappy that it is unbearable

**B**

I'm not too worried about the future

I often worry about the future

I'm afraid that nothing good awaits me in the future

I feel that the future is hopeless and nothing will change that

C

I'm satisfied with myself

I'm not satisfied with myself

I feel self-loathing

I hate myself

D

I don't cry more than usual

I cry more often than I used to

I still want to cry

I'd like to cry, but I'm not able to

E

I'm no more nervous than I used to be

I am constantly nervous and irritable

I am constantly nervous and irritable

Everything that used to irritate me has become indifferent

F

I sleep well, as usual

I sleep worse than I used to

In the morning, I wake up 1-2 hours too early and find it difficult to get back to sleep again

I wake up a few hours too early and can't get to sleep

Age

Date of birth

Sex

.....
