# Supplementary material for: The Effect of Vinyasa Yoga Practice on the Well-Being of Breast-Cancer Patients during COVID-19 Pandemic
Source: MDPI journal article supplement (doi:10.3390/ijerph20043770), 2023-02-20
Supplement: s1 [file s1]

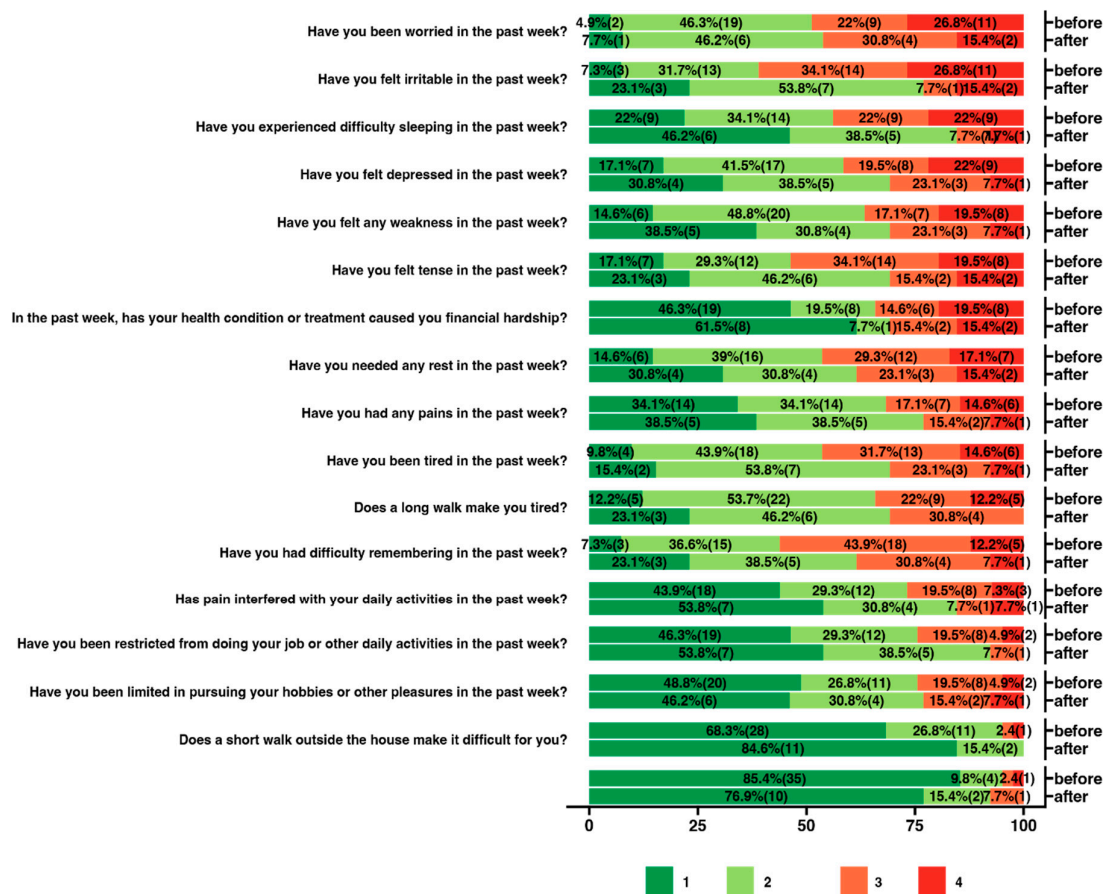

**Figure S1.** Health problems and ailments of the cancer patients who participated in yoga classes. The number of declared responses (n- shown in brackets) and the percentage distribution (%) were determined based on the results of a survey conducted before and after the yoga course. The survey questions were answered with reference to a numerical scale where 1 means never, 2-sometimes, 3-often and 4 - very often. The questions were ordered according to the answers in which most respondents marked 4 - as very often.
