# Supplementary material for: The Effect of Vinyasa Yoga Practice on the Well-Being of Breast-Cancer Patients during COVID-19 Pandemic
Source: Int J Environ Res Public Health. 2023 Feb 20;20(4):3770. doi: 10.3390/ijerph20043770 (PMC9967391; doi:10.3390/ijerph20043770)
Supplement: Supplementary file 1 [file ijerph-20-03770-s001.zip › raw data.xlsx]

## Sheet: Arkusz1
Before	Do you practice yoga?	What are your motivations to practice yoga?		How do you assess your overall health during the past week?		Does a long walk make you tired?	Does a short walk outside the house make it difficult for you?	Do you need help eating, dressing, washing yourself or using the toilet?	Have you been restricted from doing your job or other daily activities in the past week?	Have you been limited in pursuing your hobbies or other pleasures in the past week?		Have you had any pains in the past week?	Have you needed any rest in the past week?	Have you experienced difficulty sleeping in the past week?	Have you felt any weakness in the past week?		Have you been tired in the past week?	Has pain interfered with your daily activities in the past week?		Have you felt tense in the past week?	Have you been worried in the past week?	Have you felt irritable in the past week?	Have you felt depressed in the past week?	Have you had difficulty remembering in the past week?			In the past week, has your health condition or treatment caused you financial hardship?	A	B		C		D	E		F		Have recent worries kept you up at night?		Have you been able to enjoy your usual daily activities lately?	Age
	I never practiced yoga	better stress management, specific health needs, the desire to stretch the body, The need to integrate psyche and body		7		1	1	1	1	1		1	1	2	1		1	1		3	3	3	1	2			3	I'm not sad or depressed	I'm not too worried about the future		I'm satisfied with myself		I don't cry more than usual	I'm no more nervous than I used to be		In the morning, I wake up 1-2 hours too early and find it difficult to get back to sleep again		3		1	46 - 51
	I never practiced yoga	better stress management, improved quality of sleep, the desire to stretch the body, the need to increase vitality		3		4	1	1	3	3		4	4	3	3		3	4		3	3	3	3	3			1	I often feel sad and depressed	I often worry about the future		I'm not satisfied with myself		I cry more often than I used to	I am constantly nervous and irritable		I sleep worse than I used to		2		2	46 - 51
	I never practiced yoga	better stress management, the desire to stretch the body, The need to integrate psyche and body		5		2	1	1	1	1		1	1	2	1		2	1		3	3	3	3	2			1	I often feel sad and depressed	I often worry about the future		I'm not satisfied with myself		I don't cry more than usual	I am constantly nervous and irritable		I wake up a few hours too early and can't get to sleep		2		3	46 - 51
	Yes, sometimes	specific health needs, the desire to stretch the body, the need to increase vitality		6		2	1	1	1	1		2	2	4	2		2	2		1	2	3	2	2			1	I'm not sad or depressed	I often worry about the future		I'm satisfied with myself		I don't cry more than usual	I'm more nervous and unpleasant than before		I sleep worse than I used to		3		3	37-45
	Yes, sometimes	better stress management, improved quality of sleep, the desire to stretch the body		6		1	1	1	1	1		1	1	4	1		1	1		3	4	4	4	3			1	I often feel sad and depressed	I'm afraid that nothing good awaits me in the future		I'm satisfied with myself		I cry more often than I used to	I am constantly nervous and irritable		In the morning, I wake up 1-2 hours too early and find it difficult to get back to sleep again		4		2	37-45
	Yes, sometimes	better stress management, improved quality of sleep, the desire to stretch the body, meditation/spiritual needs		6		2	1	1	1	1		1	1	4	2		2	1		4	4	4	4	3			1	I often feel sad and depressed	I often worry about the future		I'm satisfied with myself		I don't cry more than usual	I am constantly nervous and irritable		I wake up a few hours too early and can't get to sleep		4		4	37-45
	Yes, sometimes	better stress management, the desire to stretch the body, build strength, meditation/spiritual needs, The need to integrate psyche and body, the need to increase vitality		6		1	1	1	1	1		1	1	1	1		2	1		2	2	3	2	2			1	I'm not sad or depressed	I often worry about the future		I'm satisfied with myself		I cry more often than I used to	I'm more nervous and unpleasant than before		I sleep worse than I used to		1		2	46 - 51
	Yes, sometimes	better stress management		4		4	4	1	2	3		2	4	2	4		4	3		4	4	4	4	4			4	I often feel sad and depressed	I'm afraid that nothing good awaits me in the future		I'm not satisfied with myself		I'd like to cry, but I'm not able to	I am constantly nervous and irritable		In the morning, I wake up 1-2 hours too early and find it difficult to get back to sleep again		2		4	61-69
	Yes, sometimes	the desire to stretch the body, build strength, The need to integrate psyche and body, the need to increase vitality		5		2	1	1	4	4		3	4	1	4		4	4		4	4	4	2	4			3	I often feel sad and depressed	I often worry about the future		I'm satisfied with myself		I don't cry more than usual	I'm no more nervous than I used to be		I sleep well, as usual		1		1	37-45
	I never practiced yoga	specific health needs, meditation/spiritual needs, the need to increase vitality		6		2	1	1	1	1		1	2	2	2		2	1		2	2	2	2	3			1	I'm not sad or depressed	I'm not too worried about the future		I'm satisfied with myself		I don't cry more than usual	I'm no more nervous than I used to be		I sleep well, as usual		2		2	46 - 51
	Yes, sometimes	improved quality of sleep, the desire to stretch the body, The need to integrate psyche and body		4		3	2	1	2	2		3	3	4	3		2	2		4	4	4	4	2			1	I am experiencing constant sadness, depression and I cannot free myself from these experiences	I'm afraid that nothing good awaits me in the future		I'm satisfied with myself		I still want to cry	I am constantly nervous and irritable		I wake up a few hours too early and can't get to sleep		4		4	61-69
	I never practiced yoga	better stress management, the desire to stretch the body, build strength, meditation/spiritual needs, The need to integrate psyche and body, the need to increase vitality		4		2	2	1	4	4		3	4	3	4		4	3		3	3	4	3	4			3	I often feel sad and depressed	I often worry about the future		I feel self-loathing		I cry more often than I used to	I am constantly nervous and irritable		I sleep well, as usual		2		3	25-30
	I never practiced yoga	better stress management, specific health needs, the desire to stretch the body, build strength, The need to integrate psyche and body, the need to increase vitality		4		2	1	1	2	1		1	3	3	3		3	2		2	2	2	2	4			1	I often feel sad and depressed	I often worry about the future		I'm satisfied with myself		I don't cry more than usual	I'm more nervous and unpleasant than before		I sleep worse than I used to		2		3	61-69
	Yes, sometimes	better stress management, the desire to stretch the body, build strength, the need to increase vitality		4		2	1	1	1	1		2	2	2	2		3	1		3	2	2	2	2			1	I'm not sad or depressed	I'm not too worried about the future		I'm satisfied with myself		I don't cry more than usual	I'm no more nervous than I used to be		I sleep worse than I used to		1		1	46 - 51
	Yes, sometimes	better stress management		4		2	2	1	2	2		2	3	4	2		3	2		4	4	4	4	2			2	I often feel sad and depressed	I'm not too worried about the future		I'm satisfied with myself		I cry more often than I used to	I'm more nervous and unpleasant than before		I wake up a few hours too early and can't get to sleep		2		3	37-45
	I never practiced yoga	better stress management, specific health needs, the desire to stretch the body, the need to increase vitality		4		3	2	1	3	3		4	4	4	4		4	3		4	4	4	4	3			4	I often feel sad and depressed	I'm afraid that nothing good awaits me in the future		I'm not satisfied with myself		I cry more often than I used to	Everything that used to irritate me has become indifferent		I sleep worse than I used to		3		2	37-45
	Yes, sometimes	the desire to stretch the body, build strength, the need to increase vitality		5		2	1	1	2	2		1	2	1	1		1	1		1	2	2	1	2			1	I'm not sad or depressed	I often worry about the future		I'm not satisfied with myself		I don't cry more than usual	I'm no more nervous than I used to be		I sleep well, as usual		1		1	37-45
	Yes, sometimes	better stress management, the desire to stretch the body, The need to integrate psyche and body, the need to increase vitality		5		2	1	1	1	1		2	2	2	2		2	1		1	2	2	2	2			1	I'm not sad or depressed	I often worry about the future		I'm satisfied with myself		I don't cry more than usual	I'm more nervous and unpleasant than before		I sleep worse than I used to		2		1	46 - 51
	Yes, sometimes	better stress management, the desire to stretch the body, build strength, meditation/spiritual needs, the need to increase vitality		4		3	2	1	1	1		2	2	2	2		2	2		2	2	3	2	3			2	I often feel sad and depressed	I often worry about the future		I'm not satisfied with myself		I cry more often than I used to	I'm more nervous and unpleasant than before		I sleep worse than I used to		1		4	37-45
	I never practiced yoga	specific health needs, The need to integrate psyche and body, the need to increase vitality		4		3	2	1	1	1		1	3	2	2		2	1		2	2	2	2	1			1	I often feel sad and depressed	I often worry about the future		I'm satisfied with myself		I don't cry more than usual	I'm no more nervous than I used to be		I sleep worse than I used to		1		1	61-69
	Yes, regularly	better stress management, improved quality of sleep, the desire to stretch the body, build strength, meditation/spiritual needs, The need to integrate psyche and body, the need to increase vitality		5		4	1	1	2	2		2	3	3	3		2	1		1	2	1	1	2			2	I'm not sad or depressed	I'm not too worried about the future		I'm satisfied with myself		I don't cry more than usual	I'm no more nervous than I used to be		I sleep worse than I used to		2		1	46 - 51
	I never practiced yoga	better stress management, specific health needs, the desire to stretch the body, the need to increase vitality		5		3	2	1	3	2		4	3	4	4		3	2		3	4	3	3	2			4	I often feel sad and depressed	I'm afraid that nothing good awaits me in the future		I'm not satisfied with myself		I cry more often than I used to	I'm more nervous and unpleasant than before		I sleep worse than I used to		3		2	37-45
	I never practiced yoga	the desire to stretch the body, The need to integrate psyche and body, the need to increase vitality		5		2	1	1	2	2		1	2	1	3		3	1		3	2	3	3	3			4	I often feel sad and depressed	I often worry about the future		I feel self-loathing		I'd like to cry, but I'm not able to	I'm no more nervous than I used to be		I sleep well, as usual		1		2	25-30
	Yes, sometimes	better stress management, specific health needs, meditation/spiritual needs, The need to integrate psyche and body		4		2	1	1	2	2		2	3	2	2		3	1		3	2	4	2	2			2	I'm not sad or depressed	I often worry about the future		I'm satisfied with myself		I don't cry more than usual	I'm more nervous and unpleasant than before		I sleep well, as usual		2		1	37-45
	Yes, sometimes	better stress management, the desire to stretch the body, build strength, meditation/spiritual needs, the need to increase vitality		5		2	1	1	1	1		1	1	2	1		2	1		2	2	1	2	1			1	I'm not sad or depressed	I often worry about the future		I'm not satisfied with myself		I don't cry more than usual	I'm no more nervous than I used to be		I sleep worse than I used to		2		2	46 - 51
	Yes, sometimes	the need to increase vitality		3		4	2	1	3	3		4	4	3	4		4	4		3	3	4	2	3			4	I often feel sad and depressed	I'm not too worried about the future		I'm not satisfied with myself		I don't cry more than usual	I'm more nervous and unpleasant than before		In the morning, I wake up 1-2 hours too early and find it difficult to get back to sleep again		2		2	52- 60
	Yes, sometimes	improved quality of sleep, the desire to stretch the body, The need to integrate psyche and body, the need to increase vitality		5		1	1	1	1	1		2	2	3	2		2	1		3	2	2	2	3			1	I'm not sad or depressed	I'm not too worried about the future		I'm satisfied with myself		I don't cry more than usual	I'm no more nervous than I used to be		I sleep worse than I used to		2		2	52- 60
	Yes, sometimes	the desire to stretch the body, The need to integrate psyche and body		5		2	1	1	2	1		1	2	3	2		2	1		2	4	2	4	3			4	I often feel sad and depressed	I often worry about the future		I feel self-loathing		I don't cry more than usual	I'm no more nervous than I used to be		I sleep worse than I used to		3		4	31-36
	Yes, sometimes	the desire to stretch the body, meditation/spiritual needs, The need to integrate psyche and body, the need to increase vitality		3		3	1	1	3	3		3	3	1	4		4	3		2	3	3	2	3			4	I often feel sad and depressed	I often worry about the future		I'm not satisfied with myself		I cry more often than I used to	I'm more nervous and unpleasant than before		I sleep well, as usual		1		2	37-45
	Yes, sometimes	better stress management, improved quality of sleep, the desire to stretch the body, build strength, meditation/spiritual needs, the need to increase vitality		4		2	2	1	2	2		2	2	2	2		2	2		3	3	3	3	3			3	I often feel sad and depressed	I often worry about the future		I'm not satisfied with myself		I cry more often than I used to	I'm more nervous and unpleasant than before		I sleep worse than I used to		2		2	37-45
	Yes, sometimes	better stress management, the desire to stretch the body, build strength, The need to integrate psyche and body, the need to increase vitality		4		2	1	1	1	1		3	3	1	2		3	2		2	2	2	2	2			2	I often feel sad and depressed	I'm not too worried about the future		I'm not satisfied with myself		I don't cry more than usual	I'm no more nervous than I used to be		I sleep well, as usual		1		3	46 - 51
	Yes, sometimes	better stress management		4		2	2	2	1	1		2	2	3	2		3	1		4	4	4	4	4			2	I am constantly so sad and unhappy that it is unbearable	I often worry about the future		I'm not satisfied with myself		I don't cry more than usual	I'm more nervous and unpleasant than before		In the morning, I wake up 1-2 hours too early and find it difficult to get back to sleep again		3		3	61-69
	Yes, sometimes	better stress management, improved quality of sleep, specific health needs, the desire to stretch the body, meditation/spiritual needs, The need to integrate psyche and body, the need to increase vitality		5		3	1	1	2	1		2	2	2	2		2	2		2	1	2	1	2			3	I'm not sad or depressed	I'm not too worried about the future		I'm satisfied with myself		I don't cry more than usual	I'm no more nervous than I used to be		I sleep well, as usual		1		1	52- 60
	I never practiced yoga	the desire to stretch the body		5		2	1	1	2	2		2	2	1	2		2	2		2	1	2	1	1			1	I'm not sad or depressed	I'm not too worried about the future		I'm satisfied with myself		I cry more often than I used to	I'm no more nervous than I used to be		I sleep well, as usual		1		1	52- 60
	Yes, sometimes	the desire to stretch the body, build strength, meditation/spiritual needs, the need to increase vitality		5		2	1	1	1	2		4	4	1	2		3	3		1	2	3	2	3			1	I often feel sad and depressed	I'm not too worried about the future		I'm satisfied with myself		I don't cry more than usual	I'm no more nervous than I used to be		I sleep well, as usual		1		1	61-69
	I never practiced yoga	improved quality of sleep, specific health needs, the desire to stretch the body, The need to integrate psyche and body, the need to increase vitality		4		3	1	1	3	3		3	3	4	2		3	3		1	3	1	1	2			4	I'm not sad or depressed	I often worry about the future		I'm not satisfied with myself		I don't cry more than usual	I'm more nervous and unpleasant than before		I sleep worse than I used to	I'm less interested in sex	2		2	52- 60
	Yes, sometimes	The need to integrate psyche and body, the need to increase vitality		4		2	1	1	1	1		2	2	2	3		2	2		3	2	3	3	3			1	I often feel sad and depressed	I often worry about the future		I feel self-loathing		I cry more often than I used to	I'm more nervous and unpleasant than before		I sleep worse than I used to	Lost interest in sex	2		3	52- 60
	Yes, sometimes	better stress management, The need to integrate psyche and body		5		1	1	1	1	2		1	2	2	2		1	1		3	3	3	3	3			3	I often feel sad and depressed	I often worry about the future		I'm not satisfied with myself		I cry more often than I used to	I am constantly nervous and irritable		I sleep worse than I used to	I'm less interested in sex	3		3	37-45
	I never practiced yoga	better stress management, the desire to stretch the body, build strength, meditation/spiritual needs, The need to integrate psyche and body, the need to increase vitality		4		3	2	1	3	3		1	2	1	2		2	2		1	2	2	1	3			2	I'm not sad or depressed	I often worry about the future		I'm not satisfied with myself		I don't cry more than usual	I'm no more nervous than I used to be		I sleep well, as usual	I'm less interested in sex	1		3	46 - 51
	Yes, sometimes	better stress management, improved quality of sleep, the desire to stretch the body, build strength, the need to increase vitality		3		2	1	1	3	3		3	3	4	4		3	3		4	4	3	4	3			2	I am experiencing constant sadness, depression and I cannot free myself from these experiences	I often worry about the future		I'm not satisfied with myself		I cry more often than I used to	Everything that used to irritate me has become indifferent		I wake up a few hours too early and can't get to sleep	I'm less interested in sex	4		4	46 - 51
	Yes, sometimes	better stress management, improved quality of sleep, specific health needs, the desire to stretch the body, the need to increase vitality		4		4	3	1	1	1		4	3	3	3		3	3		2	2	2	2	3			1	I'm not sad or depressed	I often worry about the future		I'm satisfied with myself		I don't cry more than usual	I'm no more nervous than I used to be		I sleep worse than I used to	My sexual needs have not changed	2		2	61-69
After		Did you notice the effects of yoga practice				Does a long walk make you tired?	Does a short walk outside the house make it difficult for you?	Have you been restricted from doing your job or other daily activities in the past week?	Have you been limited in pursuing your hobbies or other pleasures in the past week?			Have you had any pains in the past week?	Have you needed any rest in the past week?	Have you experienced difficulty sleeping in the past week?	Have you felt any weakness in the past week?		Have you been tired in the past week?	Has pain interfered with your daily activities in the past week?		Have you felt tense in the past week?	Have you been worried in the past week?	Have you felt irritable in the past week?	Have you felt depressed in the past week?	Have you had difficulty remembering in the past week?			In the past week, has your health condition or treatment caused you financial hardship?	A	B		C		D	E		F		Have recent worries kept you up at night?	Have you been able to enjoy your usual daily activities lately?		Age
		Improve body flexibility, Stress relief				2	1	2	2			3	3	1	3		3	2		1	3	2	2	2			3	I'm not sad or depressed	I'm not too worried about the future		I'm satisfied with myself		I don't cry more than usual	I'm no more nervous than I used to be		I sleep well, as usual		3	1		46 - 51
		Improve health, Improve body flexibility, Improving mental health, Improved respiratory capacity				3	1	2	2			4	4	3	4		4	4		4	4	2	4	3			1	I'm not sad or depressed	I often worry about the future		I'm not satisfied with myself		I cry more often than I used to	I'm no more nervous than I used to be		I sleep worse than I used to		4	1		46 - 51
		Improve body flexibility, Improving mental health, Stress relief, Reduction of sleep problems, Alleviation of digestive/stomach discomforts, Improved respiratory capacity				3	1	2	3			1	4	1	3		3	1		1	1	1	1	2			4	I'm not sad or depressed	I'm not too worried about the future		I'm satisfied with myself		I don't cry more than usual	I'm no more nervous than I used to be		I sleep well, as usual		1	1		52- 60
		Przyrost mięśni, Improve body flexibility				3	2	3	4			2	3	2	3		3	2		4	2	4	3	4			4	I often feel sad and depressed	I often worry about the future		I'm not satisfied with myself		I don't cry more than usual	I am constantly nervous and irritable		I sleep worse than I used to		2	4		37-45
		Improve health, Improving mental health, Stress relief				2	1	1	1			3	1	1	1		2	3		2	2	2	1	1			1	I'm not sad or depressed	I'm not too worried about the future		I'm satisfied with myself		I don't cry more than usual	I'm no more nervous than I used to be		I sleep well, as usual		1	2		46 - 51
		Improve body flexibility, Improving mental health, Stress relief				3	2	2	2			1	2	2	2		2	1		2	2	2	2	2			2	I'm not sad or depressed	I'm not too worried about the future		I'm satisfied with myself		I don't cry more than usual	I'm no more nervous than I used to be		I sleep worse than I used to		3	1		61-69
		Improve body flexibility, Improving mental health, Reduction of sleep problems, Fatigue reduction				1	1	1	2			1	1	1	1		1	1		2	2	2	1	1			3	I'm not sad or depressed	I'm not too worried about the future		I'm satisfied with myself		I don't cry more than usual	I'm no more nervous than I used to be		I sleep well, as usual		1	1		46 - 51
		Improve body flexibility, Stress relief, Improved respiratory capacity, Fatigue reduction				2	1	2	3			2	2	2	1		2	2		2	2	1	1	3			1	I'm not sad or depressed	I'm not too worried about the future		I'm satisfied with myself		I don't cry more than usual	I'm no more nervous than I used to be		I sleep well, as usual		2	1		46 - 51
		Improve body flexibility, Stress relief				1	1	1	1			2	1	1	1		2	1		2	3	1	2	1			1	I'm not sad or depressed	I often worry about the future		I'm satisfied with myself		I don't cry more than usual	I'm no more nervous than I used to be		I sleep well, as usual		1	1		46 - 51
		Improve health, muscle gain, Improve body flexibility, Improving mental health, Stress relief, Reduction of sleep problems				1	1	1	1			1	1	4	1		1	1		3	4	4	3	3			1	I often feel sad and depressed	I'm afraid that nothing good awaits me in the future		I'm satisfied with myself		I don't cry more than usual	I'm no more nervous than I used to be		I sleep worse than I used to		3	2		37-45
		Fatigue reduction				2	1	1	1			2	2	1	2		2	1		1	2	2	2	2			1	I often feel sad and depressed	I'm not too worried about the future		I'm not satisfied with myself		I don't cry more than usual	I'm no more nervous than I used to be		I sleep well, as usual		1	1		52- 60
		Improving mental health, Stress relief, Alleviation of digestive/stomach discomforts, Fatigue reduction				2	1	1	1			2	2	2	2		2	2		2	3	2	2	2			1	I often feel sad and depressed	I often worry about the future		I'm not satisfied with myself		I don't cry more than usual	I'm no more nervous than I used to be		I sleep well, as usual		2	2		37-45
		Improve body flexibility, Improving mental health, Stress relief				2	1	1	1			1	3	2	2		2	1		3	3	3	3	3			1	I am experiencing constant sadness, depression and I cannot free myself from these experiences	I often worry about the future		I'm not satisfied with myself		I don't cry more than usual	I'm more nervous and unpleasant than before		I sleep worse than I used to		2	3		61-69
